# Supplementary material for: Incomplete dominance of deleterious alleles contributes substantially to trait variation and heterosis in maize
Source: PubMed Central journal article supplement (PMC5633198; doi:10.1371/journal.pgen.1007019), 2017-09-27
Supplement: pgen.1007019.s003.pdf [file pgen.1007019.s003.pdf]

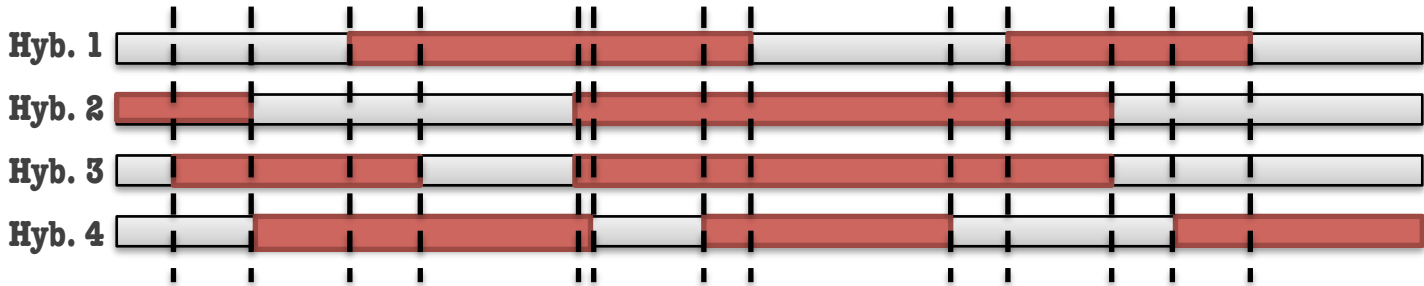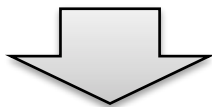

|      | HB1 | HB2 | HB3 | HB4 | HB5 | HB6 | HB7 | HB8 | HB9 | HB10 | HB11 | HB12 | HB13 | HB14 |
|------|-----|-----|-----|-----|-----|-----|-----|-----|-----|------|------|------|------|------|
| Hyb1 | 0   | 0   | 0   | 1   | 1   | 1   | 1   | 1   | 0   | 0    | 1    | 1    | 1    | 0    |
| Hyb2 | 1   | 1   | 0   | 0   | 0   | 1   | 1   | 1   | 1   | 1    | 1    | 0    | 0    | 0    |
| Hyb3 | 0   | 1   | 1   | 1   | 0   | 1   | 1   | 1   | 1   | 1    | 1    | 0    | 0    | 0    |
| Hyb4 | 0   | 0   | 1   | 1   | 1   | 1   | 0   | 1   | 1   | 0    | 0    | 0    | 1    | 1    |
