# Supplementary material for: Incomplete dominance of deleterious alleles contributes substantially to trait variation and heterosis in maize
Source: PubMed Central journal article supplement (PMC5633198; doi:10.1371/journal.pgen.1007019), 2017-09-27

**a** Grain Yield excluding B73-related Hybrids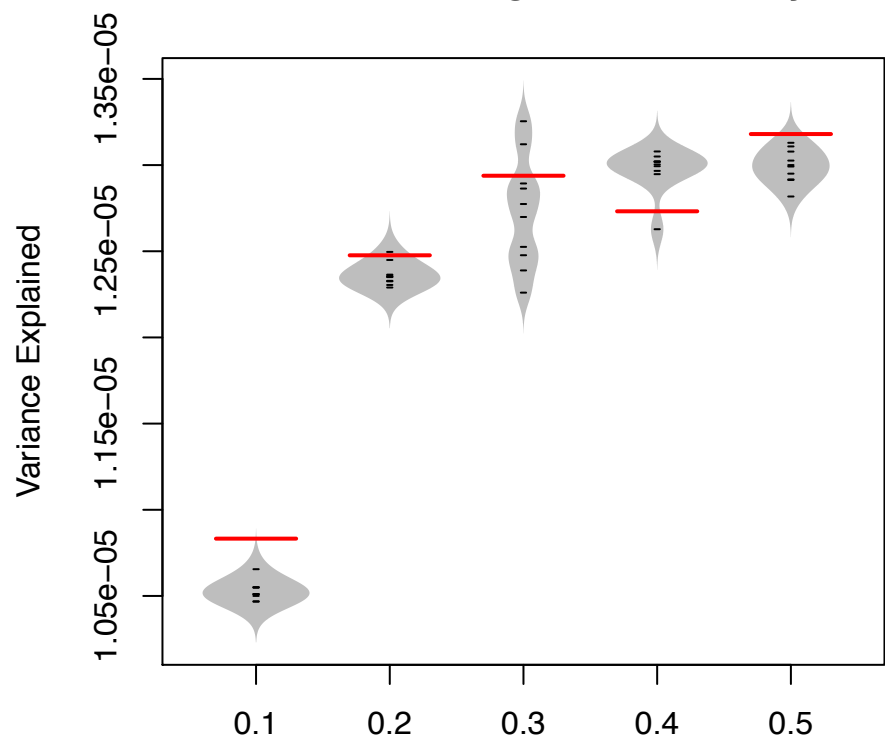**b**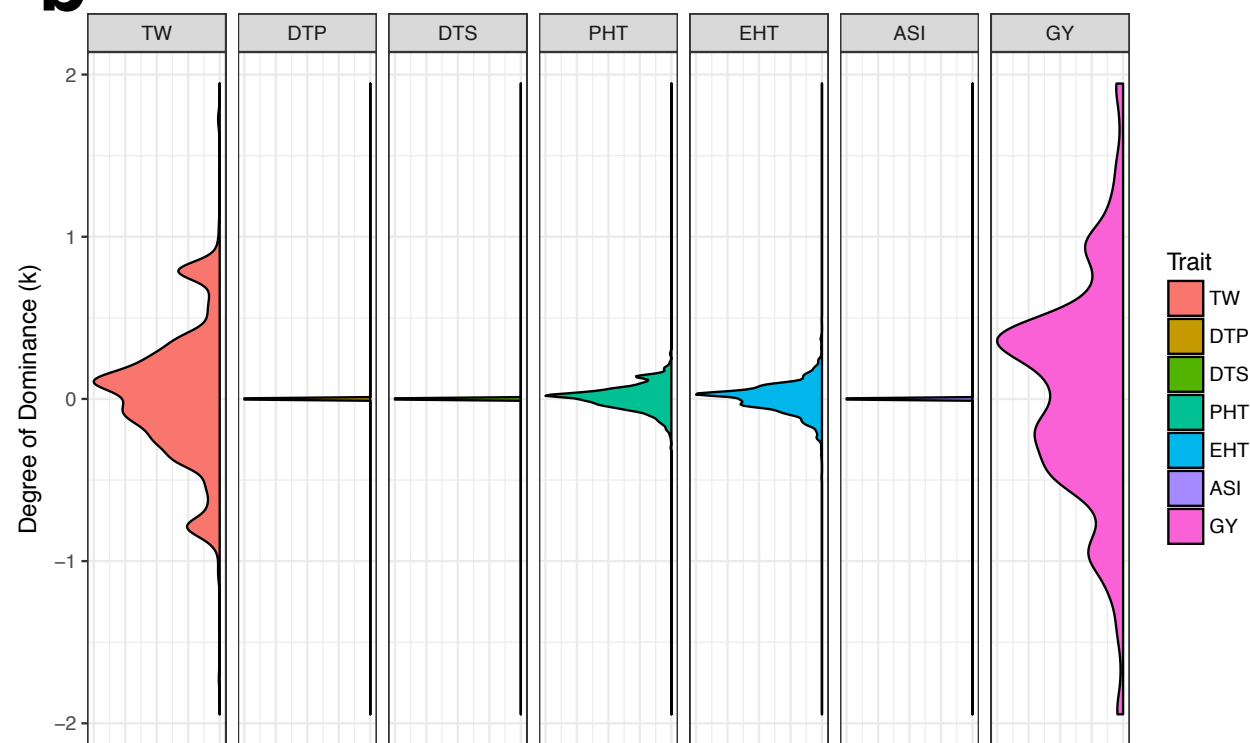**c** Allele Frequency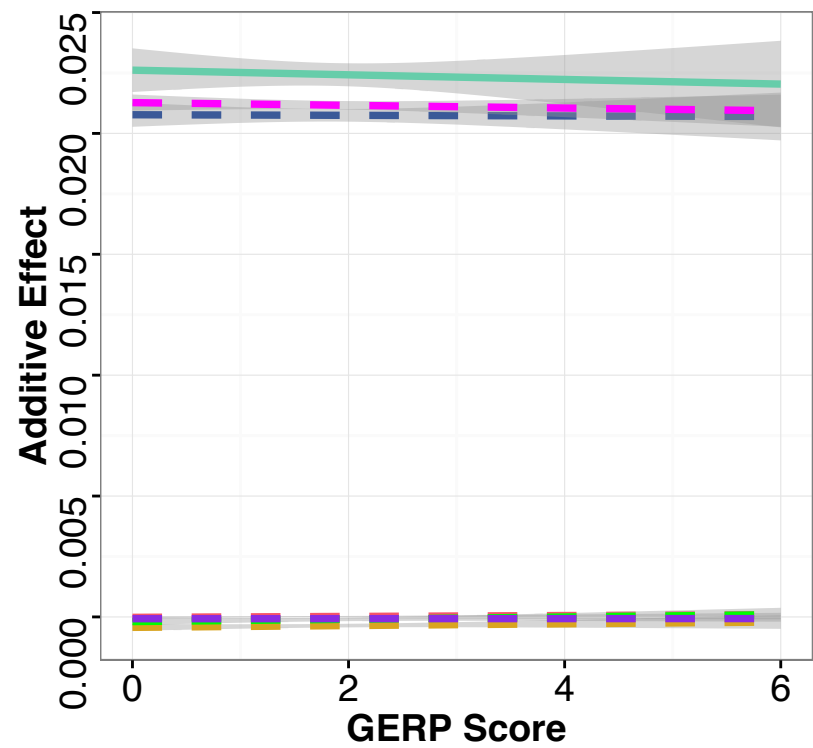**d**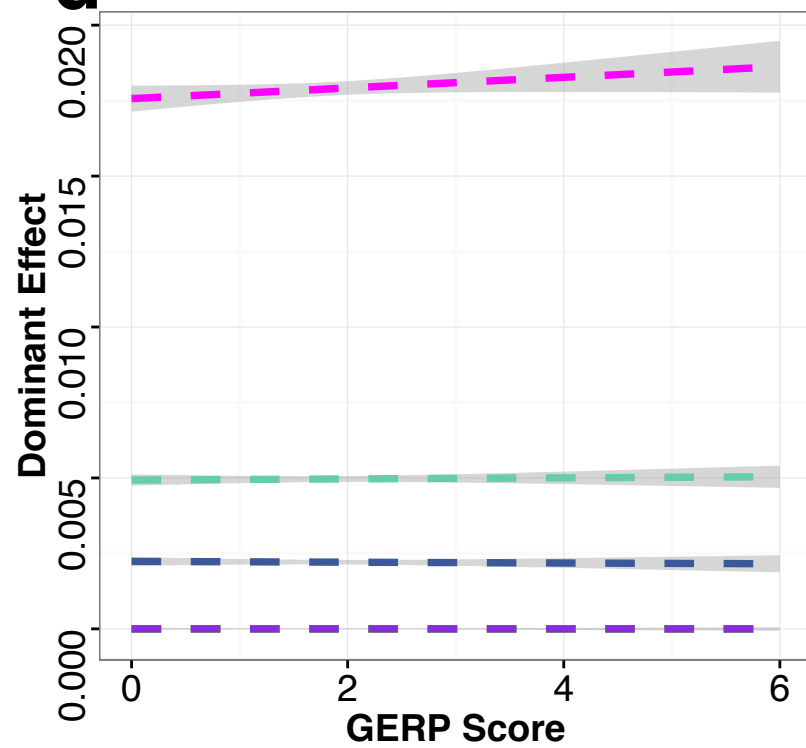**e**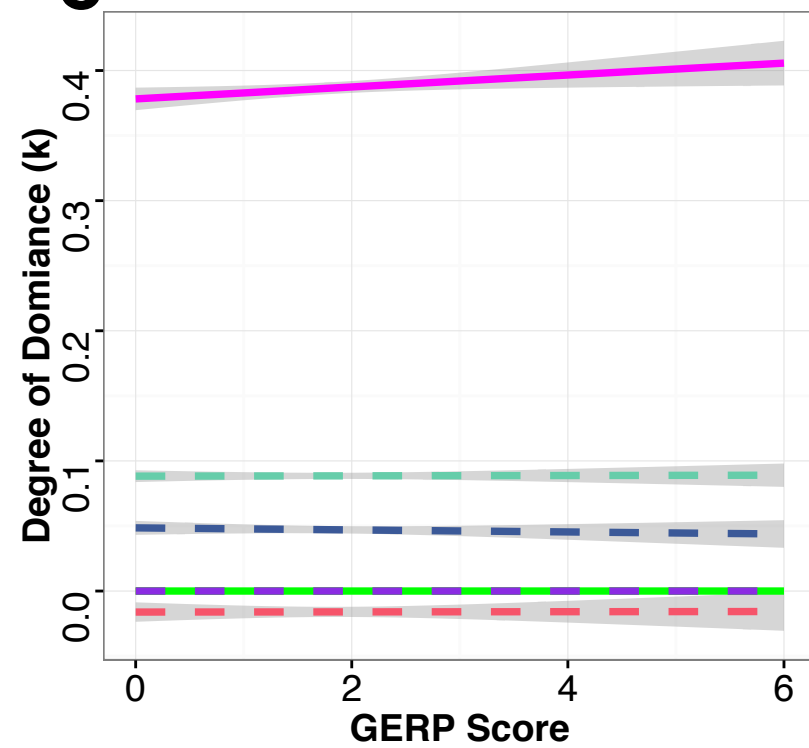

Supplement: pgen.1007019.s010.pdf [file pgen.1007019.s010.pdf]
