# Supplementary material for: Incomplete dominance of deleterious alleles contributes substantially to trait variation and heterosis in maize
Source: PubMed Central journal article supplement (PMC5633198; doi:10.1371/journal.pgen.1007019), 2017-09-27

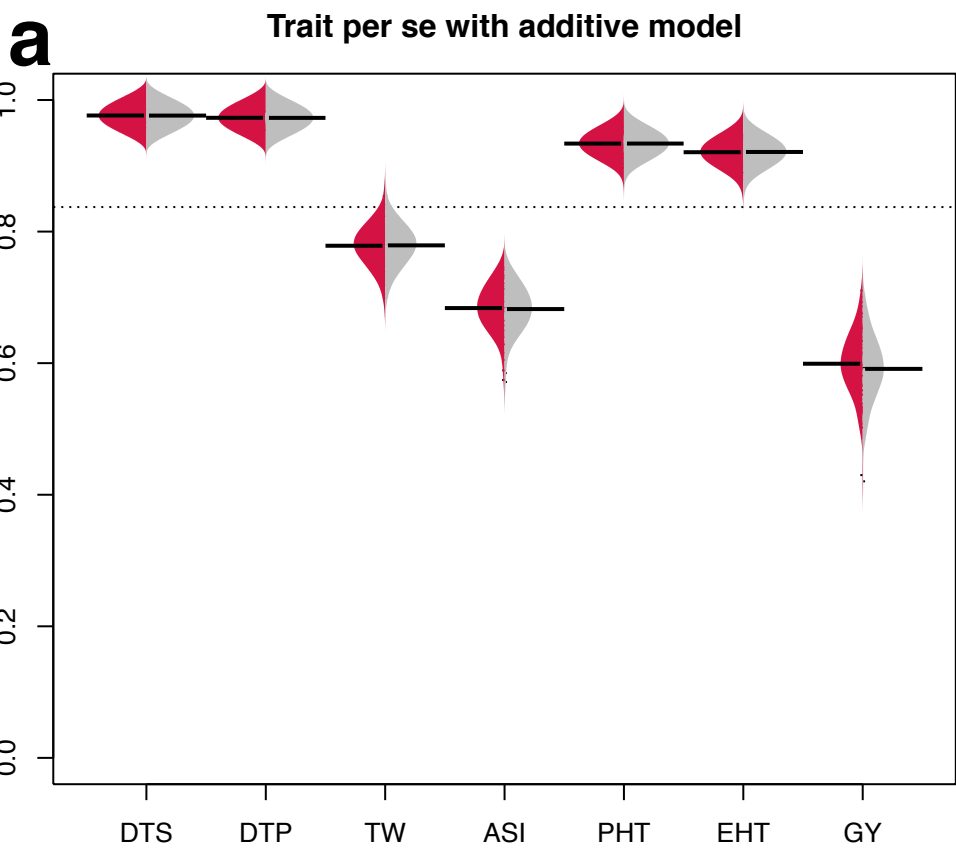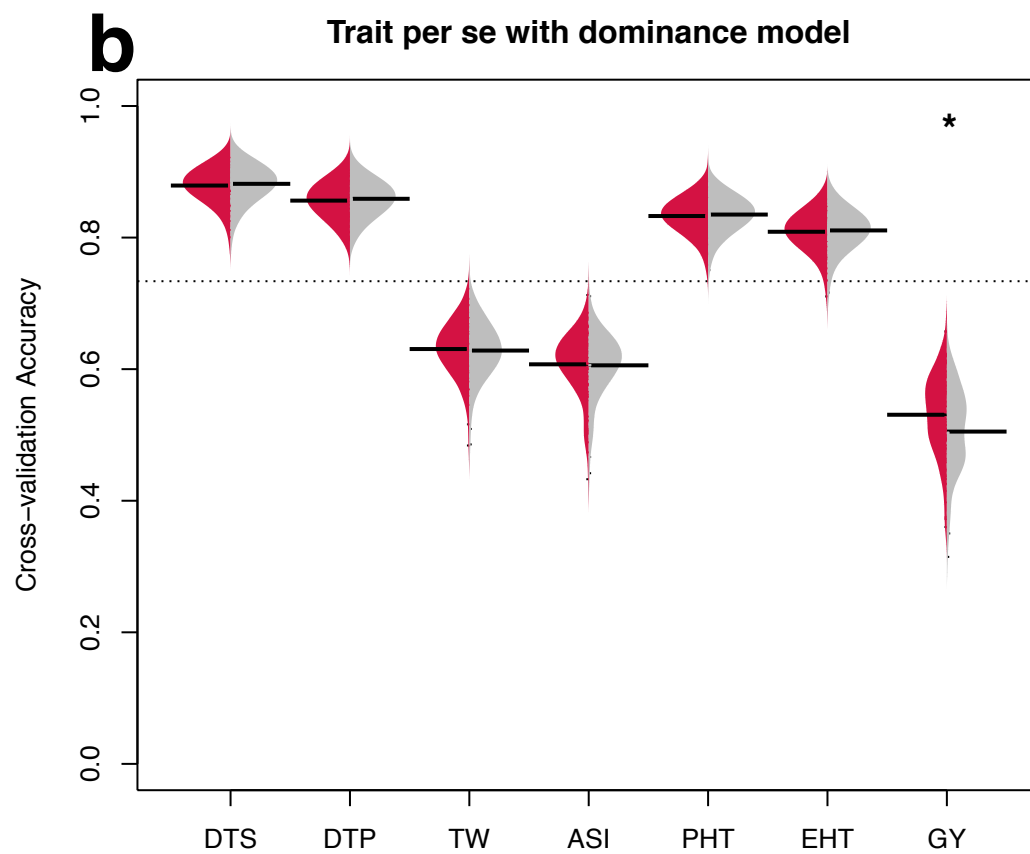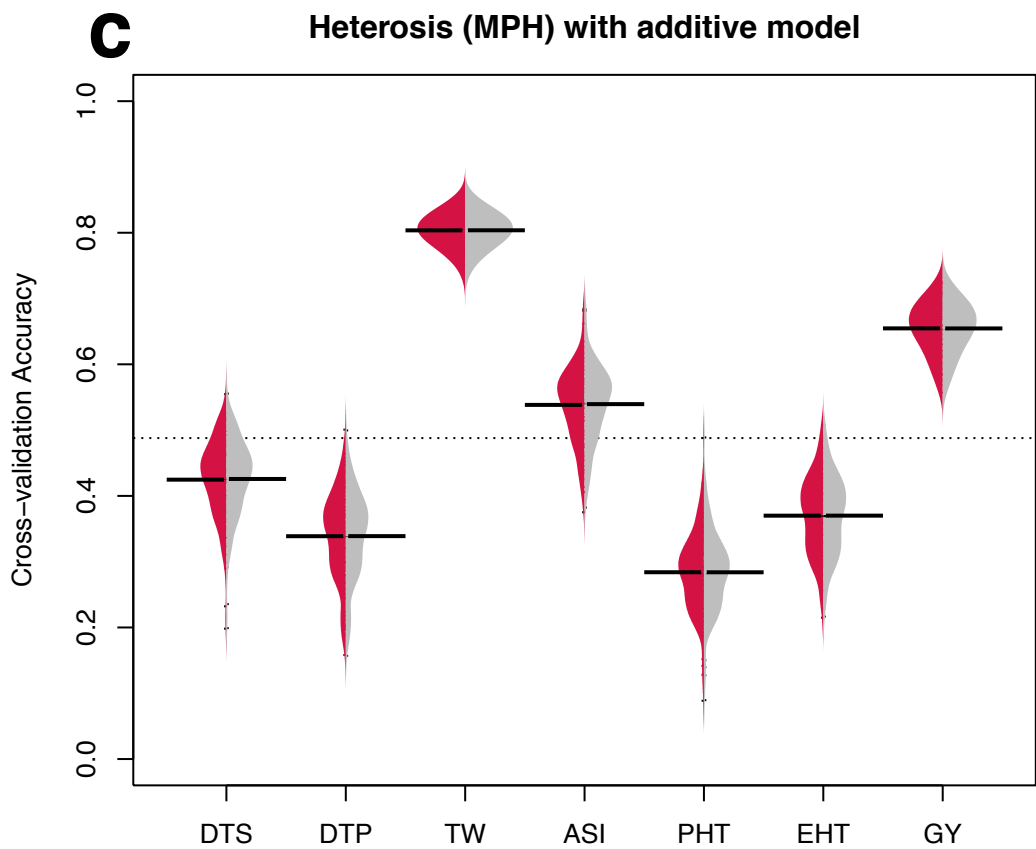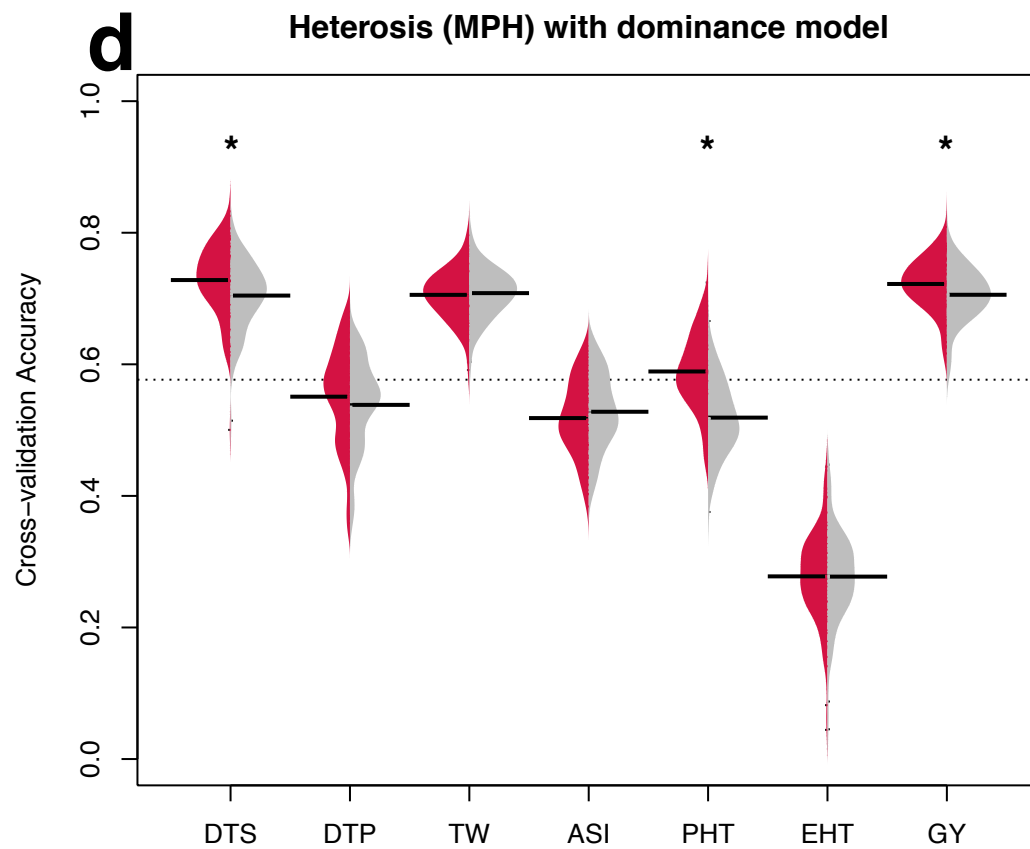

Supplement: pgen.1007019.s013.pdf [file pgen.1007019.s013.pdf]
