# Supplementary material for: Incomplete dominance of deleterious alleles contributes substantially to trait variation and heterosis in maize
Source: PLoS Genet. 2017 Sep 27;13(9):e1007019. doi: 10.1371/journal.pgen.1007019 (PMC5633198; doi:10.1371/journal.pgen.1007019)
Supplement: S7 Table — (CSV) [file pgen.1007019.s021.csv]

trait	phenotype	P-value	correlation_r	withB73
PHT	perse	0.364082569	-0.000387032	no
PHT	MPH	0.631550521	-0.000105332	no
EHT	perse	0.491720281	-0.00016351	no
EHT	MPH	0.660081991	-5.94E-05	no
DTS	perse	0.361402207	4.94E-05	no
DTS	MPH	0.705907884	-8.95E-06	no
DTP	perse	0.364579311	4.53E-05	no
DTP	MPH	0.759750992	6.28E-06	no
ASI	perse	0.708522124	-4.57E-06	no
ASI	MPH	0.293927939	1.43E-05	no
GY	perse	0.000198095	-0.000909349	no
GY	MPH	0.023413414	-0.000784417	no
TW	perse	0.568510594	1.31E-05	no
TW	MPH	0.890077693	-3.42E-06	no
PHT	perse	0.04701777	-0.000343372	yes
PHT	MPH	0.425560579	-6.87E-05	yes
EHT	perse	0.007114478	-0.000263862	yes
EHT	MPH	0.410042091	-4.42E-05	yes
DTS	perse	0.798600443	-5.43E-06	yes
DTS	MPH	0.48219369	-6.55E-06	yes
DTP	perse	0.992724992	-1.80E-07	yes
DTP	MPH	0.431207423	6.18E-06	yes
ASI	perse	0.339675967	4.53E-06	yes
ASI	MPH	0.026367382	1.21E-05	yes
GY	perse	0.001833642	-0.000334776	yes
GY	MPH	0.27930182	-0.000152929	yes
TW	perse	0.738961443	3.23E-06	yes
TW	MPH	0.278799836	-1.11E-05	yes
